# Supplementary material for: Stimulation of Tomato Drought Tolerance by PHYTOCHROME A and B1B2 Mutations
Source: MDPI journal article supplement (doi:10.3390/ijms24021560), 2023-01-13
Supplement: s1 [file s1]

## Supplementary Tables

**Table S1.** The P-values of post-hoc test of the studied vegetative characteristics.

| Parameter          | Conditions | WT     | <i>phyA</i> | <i>phyB1B2</i> |
|--------------------|------------|--------|-------------|----------------|
| Root surface area  | Non-stress | 4.5E-5 | 0.754       | 0.979          |
|                    | Drought    |        |             |                |
| Root length        | Non-stress | 8.3E-4 | 9.1E-7      | 0.616          |
|                    | Drought    |        |             |                |
| Stem height        | Non-stress | 4.7E-7 | 5.9E-7      | 6.1E-6         |
|                    | Drought    |        |             |                |
| Stem thickness     | Non-stress | 0.002  | 0.00027     | 0.728          |
|                    | Drought    |        |             |                |
| Plant fresh weight | Non-stress | 3E-11  | 1.2E-7      | 0.42           |
|                    | Drought    |        |             |                |
| Leaf fresh weight  | Non-stress | 8.9E-5 | 0.001       | 1.0            |
|                    | Drought    |        |             |                |
| Leaves number      | Non-stress | 3E-5   | 2.4E-4      | 0.019          |
|                    | Drought    |        |             |                |

**Table S2.** The P-values of post-hoc test of the other studied parameters.

| Parameter                       | Conditions |    | <i>phyA</i> | <i>phyB1B2</i> |
|---------------------------------|------------|----|-------------|----------------|
| Electrolyte leakage %           | Drought    | WT | 5.399E-9    | 5.401E-9       |
| Hydrogen peroxide concentration | Non-stress | WT | 0.996       | 0.737          |
|                                 | Drought    | WT | 7.84E-12    | 2.34E-10       |
| Malondialdehyde accumulation    | Non-stress | WT | 0.961       | 0.999          |
|                                 | Drought    | WT | 0.00032     | 0.00087        |
| Free radical inhibition         | Non-stress | WT | 0.999       | 0.999          |
|                                 | Drought    | WT | 0.008       | 1.6E-6         |
| Proline level                   | Non-stress | WT | 1.0         |                |
|                                 | Drought    | WT | 9.86E-13    | 1.05E-12       |
| Leaf RWC                        | Non-stress | WT | 1.0         | 0.995          |
|                                 | Drought    | WT | 2.75E-7     | 4.92E-7        |
| Shoot water content             | Non-stress | WT | 0.906       | 0.926          |
|                                 | Drought    | WT | 0.009       | 0.006          |
| Stomata pore area               | Non-stress | WT | 0.00015     | 8.7E-5         |
|                                 | Drought    | WT | 2.5E-11     | 7.8E-13        |
| Xylem thickness                 | Non-stress | WT | 1.9E-4      | 2.7E-7         |
|                                 | Drought    | WT | 5.1E-9      |                |
| Plant water uptake              | Non-stress | WT | 0.0003      | 7E-5           |

**Table S3.** The P-values of post-hoc test of the studied genes expressions.

| Gene         | Conditions |    | <i>phyA</i> | <i>phyB1B2</i> |
|--------------|------------|----|-------------|----------------|
| <i>DREB2</i> | Non-stress | WT | 0.506       | 0.531          |
|              | Drought    | WT | 3.6E-9      | 7.5E-9         |
| <i>RD29a</i> | Non-stress | WT | 0.0006      | 0.847          |
|              | Drought    | WT | 3E-5        | 2.3E-5         |
| <i>RD29b</i> | Non-stress | WT | 0.002       | 0.095          |
|              | Drought    | WT | 8.5E-13     | 8.4E-24        |
| <i>ERD1</i>  | Non-stress | WT | 0.274       | 1.0            |
|              | Drought    | WT | 0.004       | 1.1E-12        |
| <i>GRP</i>   | Non-stress | WT | 0.00024     | 0.015          |
|              | Drought    | WT | 1.1E-12     |                |
| <i>LEA</i>   | Non-stress | WT | 1.0         |                |
|              | Drought    | WT | 0.01        | 1.05E-6        |
| <i>DRCi7</i> | Non-stress | WT | 1.0         | 3.8E-5         |
|              | Drought    | WT | 1E-10       | 5.9E-12        |
| <i>ZEP</i>   | Non-stress | WT | 0.614       | 0.996          |
|              | Drought    | WT | 0.345       | 0.054          |
| <i>NCED1</i> | Non-stress | WT | 0.93        | 0.881          |
|              | Drought    | WT | 1.0         | 2.6E-7         |
| <i>PP2C</i>  | Non-stress | WT | 1.0         | 0.972          |
|              | Drought    | WT | 1.4E-5      | 1.7E-7         |

|               |            |    |         |         |
|---------------|------------|----|---------|---------|
| <i>TIP1.1</i> | Non-stress | WT | 2.4E-8  | 0.307   |
|               | Drought    | WT | 0.048   | 0.001   |
| <i>TIP2.2</i> | Non-stress | WT | 0.0001  | 0.001   |
|               | Drought    | WT | 4.8E-5  | 2.5E-7  |
| <i>PIP2.5</i> | Non-stress | WT | 0.403   | 0.00049 |
|               | Drought    | WT | 0.01    | 0.046   |
| <i>APX1</i>   | Non-stress | WT | 0.806   | 0.085   |
|               | Drought    | WT | 5.7E-5  | 0.871   |
| <i>APX2</i>   | Non-stress | WT | 1.0     | 0.601   |
|               | Drought    | WT | 7.49E-9 | 0.0009  |
| <i>CAT1</i>   | Non-stress | WT | 0.996   | 0.927   |
|               | Drought    | WT | 0.089   | 9.5E-8  |
| <i>CAT2</i>   | Non-stress | WT | 0.942   | 0.00026 |
|               | Drought    | WT | 0.408   | 9.1E-6  |
| <i>P5CS</i>   | Non-stress | WT | 0.995   | 0.388   |
|               | Drought    | WT | 8.8E-8  | 8.1E-9  |
| <i>P5CR</i>   | Non-stress | WT | 2.5E-6  | 5.8E-10 |
|               | Drought    | WT | 0.006   | 0.099   |

**Table S4.** The primers sequence used in quantitative RT-PCR test for analyzing the gene relative expression level.

| Target gene     | Sequence (5'-3') |                            | Reference |
|-----------------|------------------|----------------------------|-----------|
| <i>SIDREB2</i>  | Forward          | GCAAGAGGACTTCCACTTCT       | [77]      |
|                 | Reverse          | GCCATGTTGCCAATGCACCAA      |           |
| <i>SIERD1</i>   | Forward          | TGGGTTTCTTGGTTCTCGAA       |           |
|                 | Reverse          | CTGAGGTAGCTGAACTGGAG       |           |
| <i>SIRD29A</i>  | Forward          | AAGGTGCAGGGAAGAGTATG       |           |
|                 | Reverse          | CTAGTAGGAGTCTGTGCTGGT      |           |
| <i>SIRD29B</i>  | Forward          | GAATCCGAGCAATCCACAAG       |           |
|                 | Reverse          | GAGGCGACAATGTTCTTAGC       |           |
| <i>SILEA</i>    | Forward          | CTGTTGTTTTAATAACATAAAGTTTG |           |
|                 | Reverse          | TCACATAAACCTAACATCATCAAATC |           |
| <i>SIDRCi7</i>  | Forward          | TTGTGTTTCTGTGTTGTTTGG      | [78]      |
|                 | Reverse          | GCACATACATATGCACTTACATACAG |           |
| <i>SIGRP</i>    | Forward          | CCGGAAGTGTTGTTCTCTAGA      |           |
|                 | Reverse          | CAATAAGCTCCAAAAGCAGC       |           |
| <i>SITIP1;1</i> | Forward          | ATTGCTTGGCTCTGTTGTTG       |           |
|                 | Reverse          | TTGCCTACACCAACTCCATT       |           |
| <i>SITIP2;2</i> | Forward          | TCACGTTAATCCCGCTGTTA       |           |
|                 | Reverse          | CAGTCAATCCTCCGGTAACA       |           |
| <i>SIP2.5</i>   | Forward          | GGGATTTCTGGTGGGCATAT       |           |
|                 | Reverse          | CCTTCACTAAACCAACGCC        |           |

|                    |         |                              |      |
|--------------------|---------|------------------------------|------|
| <i>SIZEP</i>       | Forward | CGGGTCCATCTCACATACAA         |      |
|                    | Reverse | CGTCTTTGCATGATATCCGG         |      |
| <i>SINCED1</i>     | Forward | CAACAGCAAGGAAGAAGACG         |      |
|                    | Reverse | TGCCTCCAAC TTCAA ACTCA       |      |
| <i>SIPP2C</i>      | Forward | TGCTAATGTCTGGAGATTCTCGTGC    |      |
|                    | Reverse | CTACTGCTAACTGCCCATCAACCC     |      |
| <i>SIAPX1</i>      | Forward | CTCTCCTTTGTGATCCTGCT         |      |
|                    | Reverse | CAGAAAGCTTCAAGTGAGCC         |      |
| <i>SIAPX2</i>      | Forward | TCATGGTGCAAACAATGGTC         |      |
|                    | Reverse | ACTTCAACAGCAACAACACC         |      |
| <i>SICAT1</i>      | Forward | ATCAGGGACATTCGTGGTTT         |      |
|                    | Reverse | TCAGGGAACGACTTAGCATC         |      |
| <i>SICAT2</i>      | Forward | GAGGTGGATTATTTGCCCTCGAGGTTTG |      |
|                    | Reverse | TACCTCTCCCCTGCCTGTTTGAAGTTG  |      |
| <i>SIP5CS</i>      | Forward | CTTGCAAAC TCAGTTCGTGT        |      |
|                    | Reverse | ATCCATCAGCAATCTCCGTT         |      |
| <i>SIP5CR</i>      | Forward | GGTGTGGTTAAGTCTGGGAT         |      |
|                    | Reverse | GACTCAAAAGCAGTACGACG         |      |
| <i>SIEXPRESSED</i> | Forward | GCTAAGAACGCTGGACCTAATG       | [76] |
|                    | Reverse | TGGGTGTGCCTTTCTGAATG         |      |
